# Supplementary material
Source: Springer Nature journal article supplement (https://www.springermedizin.de/resource/supplementary/12891_2009_637_MOESM3_ESM.pdf/9506434)

A

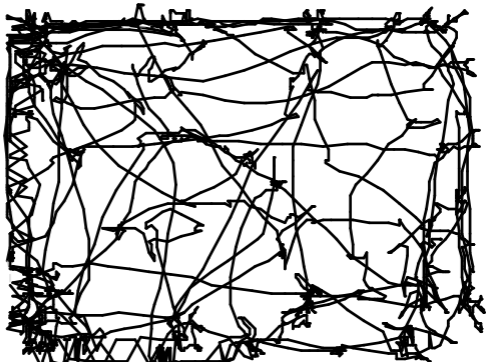

B

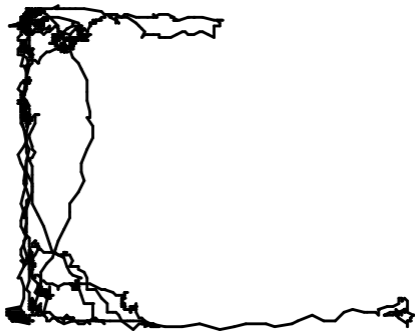

Supplement: MOESM3 [file 9506434]
